# Supplementary material for: Use of Direct Oral Anticoagulation for Isolated Distal Deep Vein Thrombosis in Japanese Orthopedic Patients
Source: PubMed Central journal article supplement — Ann Vasc Dis. 2024 Sep 23;17(4):371–7. doi: 10.3400/avd.oa.24-00061 (PMC11669022; doi:10.3400/avd.oa.24-00061), 2024-09-23
Supplement: avd-17-371-s01.pdf [file avd-17-371-s01.pdf]

**Supplementary Table 1 Embolic event cases**

| No | Age | Sex | day for event | Primary disease            | type of DOAC | Duration of DOAC | Details of VTE           |
|----|-----|-----|---------------|----------------------------|--------------|------------------|--------------------------|
| 1  | 55  | F   | 9             | osteoarthritis of the hip  | edoxaban     | 38 days          | DVT extension above knee |
| 2  | 72  | F   | 14            | osteoarthritis of the knee | edoxaban     | 229 days         | DVT extension above knee |
| 3  | 71  | F   | 75            | osteoarthritis of the knee | edoxaban     | 141 days         | DVT extension above knee |

**Supplementary Table 2 Bleeding event cases**

| No | Age | Sex | day for bleeding | Primary disease                          | type of DOAC | Duration of DOAC | HAS-BLED score | Location of bleeding                   | BARC | Primary disease related | Procedure related |
|----|-----|-----|------------------|------------------------------------------|--------------|------------------|----------------|----------------------------------------|------|-------------------------|-------------------|
| 1  | 74  | F   | 33               | rheumatoid arthritis                     | apixaban     | 351 days         | 3              | digestive tract bleeding               | 2    | No                      | No                |
| 2  | 82  | M   | 10               | postoperative osteoarthritis of the knee | edoxaban     | 22 days          | 3              | postoperative intra-articular bleeding | 2    | Yes                     | Yes               |
| 3  | 81  | F   | 185              | umber vertebral compression fracture     | apixaban     | 365 days         | 4              | hemorrhoidal bleeding                  | 2    | No                      | No                |
| 4  | 62  | F   | 1                | postoperative osteoarthritis of the knee | edoxaban     | 1 day            | 1              | postoperative intra-articular bleeding | 3    | Yes                     | Yes               |
| 5  | 85  | F   | 1                | postoperative osteoarthritis of the knee | edoxaban     | 92 days          | 3              | postoperative intra-articular bleeding | 3    | Yes                     | Yes               |
| 6  | 77  | F   | 46               | postoperative osteoarthritis of the knee | edoxaban     | 47 days          | 4              | nose bleeding                          | 2    | No                      | No                |
| 7  | 89  | F   | 14               | postoperative fracture of the thigh bone | edoxaban     | 101 days         | 2              | fundus hemorrhage                      | 2    | No                      | No                |
| 8  | 75  | F   | 42               | postoperative osteoarthritis of the knee | edoxaban     | 42 days          | 3              | postoperative intra-articular bleeding | 2    | Yes                     | Yes               |
| 9  | 72  | F   | 18               | postoperative osteoarthritis of the knee | edoxaban     | 19 days          | 4              | postoperative intra-articular bleeding | 2    | Yes                     | Yes               |
| 10 | 71  | F   | 48               | postoperative osteoarthritis of the knee | edoxaban     | 49 days          | 3              | postoperative intra-articular bleeding | 2    | Yes                     | Yes               |
